# Supplementary material for: Effects of knocking out three anthocyanin modification genes on the blue pigmentation of gentian flowers
Source: PubMed Central journal article supplement (PMC6825144; doi:10.1038/s41598-019-51808-3), 2019-11-01
Supplement: 41598_2019_51808_MOESM1_ESM.pdf [file 41598_2019_51808_MOESM1_ESM.pdf]

## **Supplementary information**

### **Effects of knocking out three anthocyanin modification genes on the blue pigmentation of gentian flowers**

Keisuke Tasaki<sup>1,2</sup>, Atsumi Higuchi<sup>1</sup>, Aiko Watanabe<sup>1</sup>, Nobuhiro Sasaki<sup>1,3</sup>, Masahiro Nishihara<sup>1\*</sup>

<sup>1</sup> Iwate Biotechnology Research Center, 22-174-4 Narita, Kitakami, Iwate 024-0003, Japan

<sup>2</sup> Present address: Tokyo University of Agriculture, Atsugi, Kanagawa 243-0034, Japan

<sup>3</sup> Present address: Toyo University, 1-1-1 Izumino, Itakura-machi, Ora-gun, Gunma 374-0193, Japan

Supplementary Table S1

Supplementary Table S2

Supplementary Figure S1

Supplementary Figure S2

Supplementary Figure S3

**Supplementary Table S1.** Primers used in this study

| Primer Name                        | Sequence                                                  | Index    | Note                                          |
|------------------------------------|-----------------------------------------------------------|----------|-----------------------------------------------|
| <b>Direct sequence primer sets</b> |                                                           |          |                                               |
| #61_Cas9U1898                      | AAGAAAGGCTCAAGACCTACGCTCAT                                | -        | Forward primer                                |
| #62_Cas9L2260                      | TCGATCACGATGTTCTCAGGCTTATG                                | -        | Reverse primer                                |
| Gt5GT_U667                         | AAAGAGCACCTGGAAGCACTTG                                    | -        | Forward primer / Used for sequencing reaction |
| Gt5GT_L1147                        | GCTCAGTTTCAGGTGCTAAAGC                                    | -        | Reverse primer                                |
| #144_Gt5/3'AT-U6                   | GCAAATCCAAATGGTGAAGG                                      | -        | Forward primer / Used for sequencing reaction |
| #145_Gt5/3'AT-L573                 | ATAGGCCCAAGCATTGATGA                                      | -        | Reverse primer                                |
| #149_Gt3'GT-U2                     | TGGATCAGCTTCACGTTTTTC                                     | -        | Forward primer                                |
| #150_Gt3'GT-L514                   | GCACCACAAAAGGGTCAGAA                                      | -        | Reverse primer / Used for sequencing reaction |
| <b>Amplicon sequence primers</b>   |                                                           |          |                                               |
| <b>1st PCR primer sets</b>         |                                                           |          |                                               |
| #368_Alb.Gt5/3'ATtar1,3_D50X       | ACACTCTTCCCTACACGACGCTCTTCCGATCtATAAGATGCAGTCCCTTCTGTTT   | -        | Forward primer                                |
| #369_Alb.Gt5/3'ATtar1,3_D70X       | TGACTGGAGTTCAGACGTGTGCTCTTCCGATCtGCAATTGAATGATGTGCCGT     | -        | Reverse primer                                |
| #372_Alb.Gt5GTtar1,2_D50X          | ACACTCTTCCCTACACGACGCTCTTCCGATCtAGAAGAAACTCCTCCGACCA      | -        | Forward primer                                |
| #373_Alb.Gt5GTtar1,2_D70X          | TGACTGGAGTTCAGACGTGTGCTCTTCCGATCtCACCCACAAGAATGGATGG      | -        | Reverse primer                                |
| #426_Alb.Gt3'GTtar1,3_D50X         | ACACTCTTCCCTACACGACGCTCTTCCGATCtACAACAACCTCCGCCATTTTC     | -        | Forward primer                                |
| #427_Alb.Gt3'GTtar1,3_D70X         | TGACTGGAGTTCAGACGTGTGCTCTTCCGATCtGCAAAAAGAACTTGACCCATGA   | -        | Reverse primer                                |
| <b>2nd PCR forward primers</b>     |                                                           |          |                                               |
| D501                               | AATGATACGGCGACCACCGAGATCTACACTATAGCCTACACTCTTCCCTACACGACG | TATAGCCT |                                               |
| D502                               | AATGATACGGCGACCACCGAGATCTACACATAGAGGCACACTCTTCCCTACACGACG | ATAGAGGC |                                               |
| D503                               | AATGATACGGCGACCACCGAGATCTACACCTATCCTACACTCTTCCCTACACGACG  | CCTATCCT |                                               |
| D504                               | AATGATACGGCGACCACCGAGATCTACACGGCTCTGAACACTCTTCCCTACACGACG | GGCTCTGA |                                               |
| D505                               | AATGATACGGCGACCACCGAGATCTACACAGGCGAAGACACTCTTCCCTACACGACG | AGGCGAAG |                                               |
| D506                               | AATGATACGGCGACCACCGAGATCTACACTAATCTTAACACTCTTCCCTACACGACG | TAATCTTA |                                               |
| D507                               | AATGATACGGCGACCACCGAGATCTACACCAGGACGTACACTCTTCCCTACACGACG | CAGGACGT |                                               |
| D508                               | AATGATACGGCGACCACCGAGATCTACACGTACTGACACACTCTTCCCTACACGACG | GTACTGAC |                                               |
| <b>2nd PCR reverse primers</b>     |                                                           |          |                                               |
| D701                               | CAAGCAGAAGACGGCATAACGAGATCGAGTAATGTGACTGGAGTTCAGACGTGT    | ATTACTCG |                                               |
| D702                               | CAAGCAGAAGACGGCATAACGAGATTCTCCGGAGTGACTGGAGTTCAGACGTGT    | TCCGGAGA |                                               |
| D703                               | CAAGCAGAAGACGGCATAACGAGATAATGAGCGGTGACTGGAGTTCAGACGTGT    | CGCTCATT |                                               |
| D705                               | CAAGCAGAAGACGGCATAACGAGATTTCTGAATGTGACTGGAGTTCAGACGTGT    | ATTCAGAA |                                               |
| D706                               | CAAGCAGAAGACGGCATAACGAGATACGAATTCGTGACTGGAGTTCAGACGTGT    | GAATTCGT |                                               |
| D707                               | CAAGCAGAAGACGGCATAACGAGATAGCTTCAGGTGACTGGAGTTCAGACGTGT    | CTGAAGCT |                                               |
| D708                               | CAAGCAGAAGACGGCATAACGAGATGCGCATTAGTGACTGGAGTTCAGACGTGT    | TAATGCGC |                                               |

**Supplementary Table S2.** Summary of NGS amplicon analyses of target sites

| Line               | Nucleotide | Number of total fragment reads | Number of Fragment patterns | Allele 1 | Allele 2 | Allele 3 | Allele 4 | Total alleles | Total alleles / total fragments | Non-mutated allele 1 | Non-mutated allele 2 | Non-mutated allele 3 | Non-mutated allele 4 | Non-mutated alleles / total fragments |
|--------------------|------------|--------------------------------|-----------------------------|----------|----------|----------|----------|---------------|---------------------------------|----------------------|----------------------|----------------------|----------------------|---------------------------------------|
| <i>Gt5GT#47</i>    | DNA        | 25,251                         | 1,831                       | 9,611    | 9,605    | -        | -        | 19,216        | 76.1%                           | 17                   | 0                    | -                    | -                    | 0.07%                                 |
| <i>Gt5GT#106</i>   | DNA        | 59,169                         | 1,836                       | 18,816   | 30,010   | -        | -        | 48,826        | 82.5%                           | 0                    | 0                    | -                    | -                    | 0.00%                                 |
| <i>Gt3'GT#11</i>   | DNA        | 74,539                         | 2,210                       | 20,194   | 35,543   | -        | -        | 55,737        | 74.8%                           | 0                    | 0                    | 0                    | 0                    | 0.00%                                 |
| <i>Gt3'GT#35</i>   | DNA        | 21,531                         | 1,288                       | 7,186    | 7,223    | -        | -        | 14,409        | 66.9%                           | 0                    | 0                    | 0                    | 0                    | 0.00%                                 |
| <i>Gt5/3'AT#50</i> | DNA        | 46,338                         | 2,243                       | 16,376   | 15,213   | -        | -        | 31,589        | 68.2%                           | 0                    | 0                    | -                    | -                    | 0.00%                                 |
| <i>Gt5/3'AT#60</i> | DNA        | 19,008                         | 2,552                       | 7,872    | 6,874    | -        | -        | 14,746        | 77.6%                           | 2                    | 1                    | -                    | -                    | 0.02%                                 |
| <i>Gt5GT#47</i>    | RNA        | 49,649                         | 1,931                       | 6,443    | 36,768   | -        | -        | 43,211        | 87.0%                           | 0                    | 0                    | -                    | -                    | 0.00%                                 |
| <i>Gt5GT#106</i>   | RNA        | 305,289                        | 2,281                       | 29,042   | 261,382  | -        | -        | 290,424       | 95.1%                           | 26                   | 0                    | -                    | -                    | 0.01%                                 |
| <i>Gt3'GT#11</i>   | RNA        | 520,911                        | 3,405                       | 35,543   | 461,515  | -        | -        | 497,058       | 95.4%                           | 63                   | 0                    | 54                   | 0                    | 0.02%                                 |
| <i>Gt3'GT#35</i>   | RNA        | 41,466                         | 2,063                       | 3,004    | 33,855   | -        | -        | 36,859        | 88.9%                           | 0                    | 1                    | 0                    | 10                   | 0.03%                                 |
| <i>Gt5/3'AT#50</i> | RNA        | 33,394                         | 3,212                       | 19,913   | 11,267   | -        | -        | 31,180        | 93.4%                           | 11                   | 5                    | -                    | -                    | 0.05%                                 |
| <i>Gt5/3'AT#60</i> | RNA        | 34,795                         | 2,046                       | 1,272    | 22,102   | -        | -        | 23,374        | 67.2%                           | 0                    | 0                    | -                    | -                    | 0.00%                                 |
| WT <i>Gt5GT</i>    | DNA        | 35,448                         | 2,555                       | 12,798   | 11,604   | -        | -        | 24,402        | 68.8%                           | 12,798               | 11,604               | -                    | -                    | 68.8%                                 |
| WT <i>Gt3'GT</i>   | DNA        | 29,916                         | 2,662                       | 5,666    | 5,419    | 5,825    | 4,852    | 21,762        | 72.7%                           | 5,666                | 5,419                | 5,825                | 4,852                | 72.7%                                 |
| WT <i>Gt5/3'AT</i> | DNA        | 44,435                         | 3,535                       | 15,403   | 18,258   | -        | -        | 33,661        | 75.8%                           | 15,403               | 18,258               | -                    | -                    | 75.8%                                 |
| WT <i>Gt5GT</i>    | RNA        | 88,071                         | 2,770                       | 50,836   | 26,024   | -        | -        | 76,860        | 87.3%                           | 50,836               | 26,024               | -                    | -                    | 87.3%                                 |
| WT <i>Gt3'GT</i>   | RNA        | 62,487                         | 2,401                       | 4,852    | 2,055    | 28,560   | 22,326   | 31,251        | 92.5%                           | 4,852                | 2,055                | 28,560               | 22,326               | 92.5%                                 |
| WT <i>Gt5/3'AT</i> | RNA        | 47,659                         | 3,678                       | 12,453   | 20,721   | -        | -        | 33,174        | 69.6%                           | 12,453               | 20,721               | -                    | -                    | 69.6%                                 |

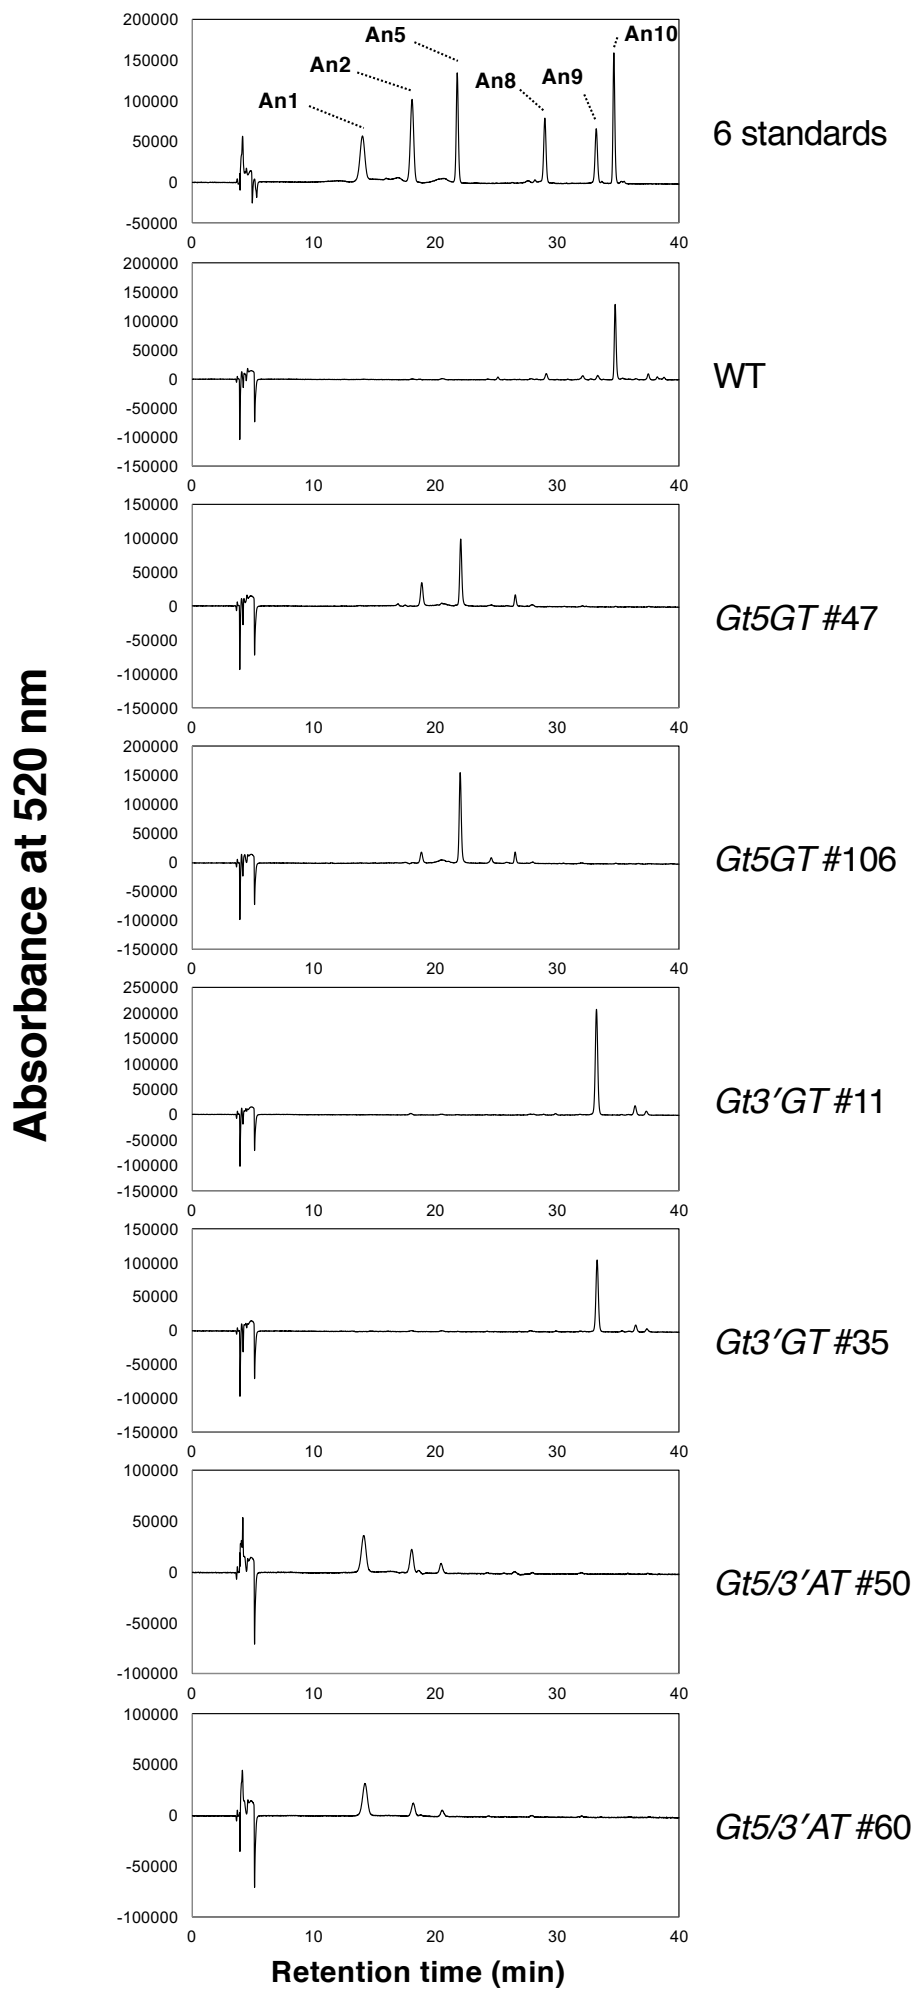

**Supplementary Fig. S1** HPLC chromatograms (at 520 nm) of anthocyanins extracted from the petals of the *Gt5GT* #47 and #106, *Gt3'GT* #11 and #35, and *Gt5/3'AT* #50 and #60 lines. The WT sample and six authentic standards are the same as those described in Fig. 4.

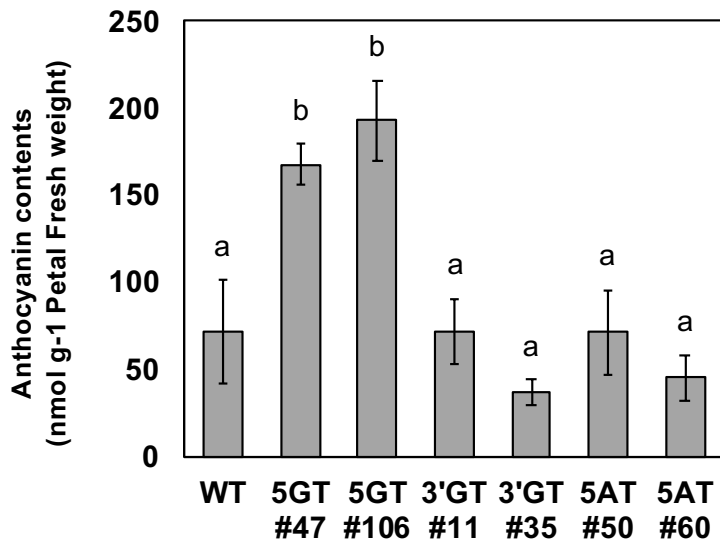

**Supplementary Fig. S2**

Anthocyanin concentrations in the flower petals of the genome-edited gentian plants. Quantification was performed based on the molar absorptivity of delphinidin ( $\epsilon_{\text{mol}} = 27,940$  at 520 nm, evaluated in 80% MeOH containing 0.1% TFA). Vertical bars show  $\pm$  SE of the means of four flowers except for 5/3'AT #50, which was calculated using three flowers. Different letters indicate statistically significant differences in Tukey's HSD test ( $P < 0.01$ ).

*Commelina communis*

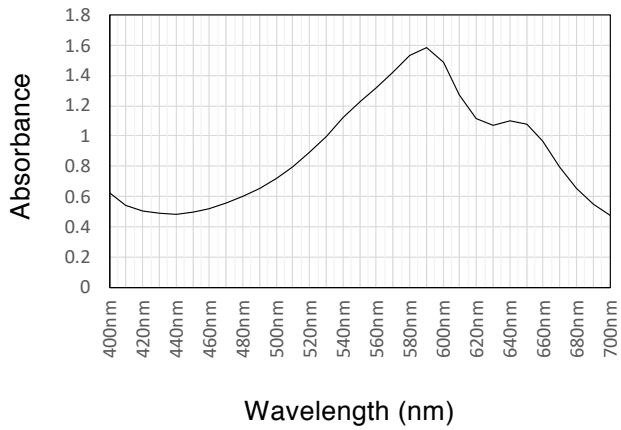

*Platycodon grandiflorus*

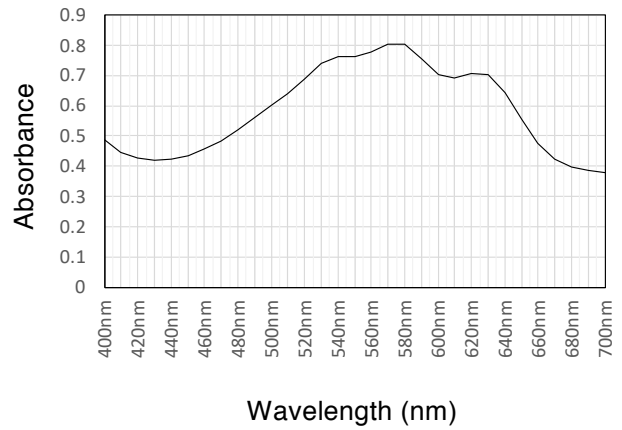

*Felicia amelloides*

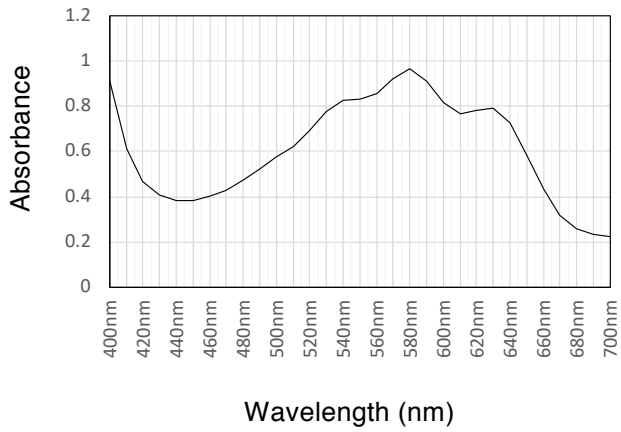

### Supplementary Fig. S3

Absorption spectra of the adaxial surface of the limb area of fresh petals.

They were measured with the CM-700d spectrophotometer (Konica Minolta, Tokyo, Japan).
